# Supplementary material
Source: PubMed Central journal article supplement (PMC8525230)
Supplement: advancesADV2021004287-suppl1.pdf [file advancesADV2021004287-suppl1.pdf]

**SUPPLEMENTAL MATERIALS**

**IFN- $\gamma$  Signature in the Plasma Proteome Distinguishes Pediatric Hemophagocytic Lymphohistiocytosis from Sepsis and SIRS**

**Running Title: IFN- $\gamma$  Distinguishes HLH from Sepsis and SIRS**

**Lin et al.**

**Table 1. Clinical Summary of Study Cohorts**

**A. Patient Cohorts**

|               | <b>Training</b> | <b>Validation</b> | <b>p-value</b> |
|---------------|-----------------|-------------------|----------------|
| <b>HLH</b>    | 21              | 19                |                |
| <b>Sepsis</b> | 13              | 13                |                |
| <b>SIRS</b>   | 10              | 11                |                |
| <b>Total</b>  | 44              | 43                | 0.9            |

**B. Training and Validation Cohorts**

|                     |           | <b>Training</b> | <b>Validation</b> | <b>p-value</b> |
|---------------------|-----------|-----------------|-------------------|----------------|
| <b>Gender</b>       | Male      | 10              | 8                 | 1.0            |
|                     | Female    | 11              | 11                |                |
| <b>Status</b>       | Alive     | 13              | 12                | 1.0            |
|                     | Dead      | 8               | 7                 |                |
| <b>Age (years)</b>  | 0-3       | 11              | 7                 | 0.3            |
|                     | 3-18      | 9               | 12                |                |
|                     | 18+       | 1               | 0                 |                |
| <b>HLH Category</b> | Primary   | 18              | 16                | 1.0            |
|                     | Secondary | 3               | 3                 |                |
| <b>Total</b>        |           | 21              | 19                |                |

**Supplemental Table 1. Diagnostic Criteria for HLH, SIRS, Sepsis and Severe Sepsis**

**A. HLH-2004 Diagnostic Criteria (Adapted from Henter *et al.*, *PBC* 2007)**

---

**Clinical Criteria for Diagnosis of HLH**

---

***HLH diagnosis is established with at least five of the following:***

Fever

Splenomegaly

Cytopenias in at least two cell lines:

Hemoglobin <90 g/L

Platelets <100 × 10<sup>9</sup>/L

Neutrophils <1 × 10<sup>9</sup>/L

Hypertriglyceridemia and/or hypofibrinogenemia:

Fasting triglycerides >3 mmol/L (>265 mg/dL)

Fibrinogen <1.5 g/L

Hemophagocytosis in marrow or spleen or lymph nodes

Low or absent activity of natural killer cells

Ferritin >500 mcg/L

Soluble cD25 (soluble interleukin-2 receptor) >2400 units/mL (or 2 SD above normal for age)

---

## **B. Definitions of Systemic Inflammatory Response Syndrome (SIRS), Sepsis, and Severe Sepsis**

(Adapted from Goldstein *et al.*, *PCCM* 2005)

---

### **Definition of Systemic Inflammatory Response Syndrome**

---

SIRS is established with at least two of the following, one must be abnormal temperature or leukocyte count

Core temperature of  $>38.5$  or  $<36^{\circ}\text{C}$

Tachycardia ( $>2$  SD above normal for age) in the absence of external stimuli, chronic drugs, or painful stimuli;

-OR otherwise unexplained persistent elevation over a 0.5-4 hour time period

-OR for children  $<1$  year, bradycardia (mean heart rate  $<10^{\text{th}}$  percentile for age) in absence of external vagal stimulus, beta-blocker drugs or congenital heart disease

-OR otherwise unexplained persistent depression over a 0.5 hr time period

Tachypnea ( $>2\text{SD}$  above normal for age)

-OR mechanical ventilation for an acute process not related to underlying neuromuscular disease or the receipt of general anesthesia.

Leukocyte count elevated or depressed for age (not secondary to chemotherapy)

-OR  $>10\%$  immature neutrophils

---

### **Definition of Sepsis**

---

SIRS in the presence or as a result of suspected or proven infection

### **Definition of Severe Sepsis**

Sepsis plus one of the following:

Cardiovascular organ dysfunction

-OR respiratory failure

-OR  $\geq 2$  other organ system dysfunction (See **Supplemental Table 1C** below)

---

**C. Organ Dysfunction Criteria (Adapted from Goldstein *et al* PCCM 2005)**

|                                                                                                                                                                                                                                                                                                                                                                                                                                                                                                                                                                                                                                                                                                                                                            |
|------------------------------------------------------------------------------------------------------------------------------------------------------------------------------------------------------------------------------------------------------------------------------------------------------------------------------------------------------------------------------------------------------------------------------------------------------------------------------------------------------------------------------------------------------------------------------------------------------------------------------------------------------------------------------------------------------------------------------------------------------------|
| <p><b>Cardiovascular</b></p> <p>Despite <math>\geq 40</math> mL/kg of intravenous fluid bolus in 1 hr:</p> <ul style="list-style-type: none"><li>○ Hypotension: defined as <math>&lt; 5^{\text{th}}</math> percentile for age or systolic BP <math>&lt; 2</math> SD below normal for age OR</li><li>○ Need for inotropes/vasopressors to maintain BP in normal range OR</li><li>○ 2 of the following:<ul style="list-style-type: none"><li>▪ Unexplained metabolic acidosis: base deficit <math>&gt; 5.0</math> mEq/L</li><li>▪ Increase arterial lactate <math>&gt; 2</math>x upper limit of normal</li><li>▪ Oliguria: urine output <math>&lt; 0.5</math> mL/kg/hr</li><li>▪ Prolonged capillary refill: <math>&gt; 5</math> seconds</li></ul></li></ul> |
| <p><b>Respiratory</b></p> <ul style="list-style-type: none"><li>• PaO<sub>2</sub>/FIO<sub>2</sub> <math>&lt; 300</math> in absence of cyanotic heart disease or preexisting lung disease OR</li><li>• PaCO<sub>2</sub> <math>&gt; 65</math> torr or 20 mmHg over baseline PaCO<sub>2</sub></li><li>• Proven need or <math>&gt; 50\%</math> FiO<sub>2</sub> to maintain saturation <math>\geq 92\%</math> OR</li><li>• Need for nonelective invasive or noninvasive mechanical ventilation</li></ul>                                                                                                                                                                                                                                                        |
| <p><b>Neurologic</b></p> <ul style="list-style-type: none"><li>• Glasgow Coma Score (GCS) <math>\leq 11</math> OR</li><li>• Acute change in mental status with a GCS <math>\geq 3</math> points from abnormal baseline</li></ul>                                                                                                                                                                                                                                                                                                                                                                                                                                                                                                                           |
| <p><b>Hematologic</b></p> <ul style="list-style-type: none"><li>• Platelet count <math>&lt; 80,000/\text{mm}^3</math> or a decline of 50% from highest value recorded over the past 3 days OR</li><li>• International normalized ratio <math>&gt; 2</math></li></ul>                                                                                                                                                                                                                                                                                                                                                                                                                                                                                       |
| <p><b>Renal</b></p> <ul style="list-style-type: none"><li>• Serum creatinine <math>&gt; 2</math> times upper limit of normal for age OR</li><li>• 2-fold increase in baseline serum creatinine</li></ul>                                                                                                                                                                                                                                                                                                                                                                                                                                                                                                                                                   |
| <p><b>Hepatic</b></p> <ul style="list-style-type: none"><li>• Total bilirubin <math>&gt; 4</math> mg/dL (not applicable for newborn) OR</li><li>• Alanine transaminase <math>&gt; 2</math> times upper limit of normal for age</li></ul>                                                                                                                                                                                                                                                                                                                                                                                                                                                                                                                   |

**Supplemental Table 2. Analytes Tested in MagMix Panels**

| <b>Luminex and Preferred Protein Names</b> |                                                             |                                  |                                                           |                                  |                                                     |
|--------------------------------------------|-------------------------------------------------------------|----------------------------------|-----------------------------------------------------------|----------------------------------|-----------------------------------------------------|
| <b>Luminex Name/Abbreviation</b>           | <b>Preferred Protein Name (Abbreviation)</b>                | <b>Luminex Name/Abbreviation</b> | <b>Preferred Protein Name (Abbreviation)</b>              | <b>Luminex Name/Abbreviation</b> | <b>Preferred Protein Name (Abbreviation)</b>        |
| 6CKine                                     | C-C motif chemokine 21 (CCL21)                              | DKK1                             | Dickkopf-related protein 1 (DKK1)                         | HE4                              | WAP four-disulfide core domain protein 2            |
| ACTH                                       | Pro-opiomelanocortin (POMC)                                 | ECM1                             | Extracellular matrix protein 1 (ECM1)                     | HGF                              | Hepatocyte Growth Factor                            |
| AFP                                        | Alpha-fetoprotein (AFP)                                     | EGF                              | Pro-epidermal growth factor (EGF)                         | HSP70                            | Heat shock 70 kDa protein 1A                        |
| Angiopoietin-2                             | Angiopoietin-2 (ANG-2)                                      | ENA-78                           | C-X-C motif chemokine 5 (CXCL5)                           | I-309                            | C-C Motif Chemokine Ligand 1                        |
| Antithrombin III                           | Antithrombin-III (ATIII)                                    | Endoglin                         | Endoglin                                                  | IFN- $\alpha$ 2                  | Interferon alpha-2 (IFN-alpha-2)                    |
| BCA-1                                      | C-X-C motif chemokine 13 (CXCL13)                           | Endothelin-1                     | Endothelin-1                                              | IFN- $\gamma$                    | Interferon Gamma (IFN-gamma)                        |
| $\beta$ -HCG                               | Choriogonadotropin subunit beta 3                           | Eotaxin                          | Eotaxin                                                   | IL-1 $\alpha$                    | Interleukin-1 alpha (IL-1 alpha)                    |
| BMP-9                                      | Growth/differentiation factor 2 (GDF-2)                     | Eotaxin-2                        | C-C motif chemokine 24                                    | IL-1 $\beta$                     | Interleukin-1 beta (IL-1 beta)                      |
| CA125                                      | Mucin-16 (MUC-16)                                           | Eotaxin-3                        | C-C motif chemokine 26                                    | IL-1RA                           | Interleukin-1 receptor antagonist protein (IL-1ra)  |
| CA15-3                                     | Mucin-1 (MUC-1)                                             | FGF-1                            | Fibroblast growth factor 1 (FGF-1)                        | IL-2                             | Interleukin-2 (IL-2)                                |
| CA19-9                                     | Alpha-N-acetylgalactosaminide alpha-2,6-sialyltransferase 6 | FGF-2                            | Fibroblast growth factor 2 (FGF-2)                        | IL-3                             | Interleukin-3 (IL-3)                                |
| CCL19/MIP-3 $\beta$                        | C-C motif chemokine 19 (CCL19)                              | FGF-23                           | Fibroblast growth factor 23 (FGF-23)                      | IL-4                             | Interleukin-4 (IL-4)                                |
| CCL20/MIP-3 $\alpha$                       | C-C motif chemokine 20 (CCL20)                              | Flt-3L                           | Fms-related tyrosine kinase 3 ligand (Flt-3L)             | IL-5                             | Interleukin-5 (IL-5)                                |
| CEA                                        | Carcinoembryonic antigen                                    | Follistatin                      | Follistatin (FS)                                          | IL-6                             | Interleukin-6 (IL-6)                                |
| CFH                                        | Complement factor H (CFH)                                   | Fractalkine                      | Fractalkine                                               | IL-7                             | Interleukin-7 (IL-7)                                |
| CTACK                                      | C-C motif chemokine 27 (CCL27)                              | G-CSF                            | Granulocyte colony-stimulating factor (G-CSF)             | IL-8                             | Interleukin-8 (IL-8)                                |
| CXCL11/I-TAC                               | C-X-C motif chemokine 11 (CXCL11)                           | GM-CSF                           | Granulocyte-macrophage colony-stimulating factor (GM-CSF) | IL-9                             | Interleukin-9 (IL-9)                                |
| CXCL6/GCP-2                                | C-X-C motif chemokine 6 (CXCL6)                             | Granzyme-B                       | Granzyme B                                                | IL-10                            | Interleukin-10 (IL-10)                              |
| CXCL9/MIG                                  | C-X-C motif chemokine 9 (CXCL9)                             | GRO                              | Growth-regulated alpha protein (GRO-alpha)                | IL-11                            | Interleukin-11 (IL-11)                              |
| CYFRA21-1                                  | CYFRA21-1                                                   | HB-EGF                           | Proheparin-binding EGF-like growth factor (HBEGF)         | IL-12(p40)                       | Interleukin-12 subunit beta (IL-12B)                |
| IL-12(p70)                                 | Interleukin-12 subunit p70 (IL-12[p70])                     | MCP-4                            | C-C motif chemokine 13 (CCL13)                            | OPN                              | Osteopontin                                         |
| IL-13                                      | Interleukin-13 (IL-13)                                      | M-CSF                            | Macrophage colony-stimulating factor 1 (M-CSF)            | PLGF                             | Placenta growth factor (PIGF)                       |
| IL-15                                      | Interleukin-15 (IL-15)                                      | MDC                              | C-C motif chemokine 22 (CCL22)                            | Prolactin                        | Prolactin (PRL)                                     |
| IL-16                                      | Pro-interleukin-16 (IL-16)                                  | MIF                              | Macrophage migration Inhibitory factor (MIF)              | PTH                              | Prolactin (PRL)                                     |
| IL-17A                                     | Interleukin-17A (IL-17A)                                    | MIP-1 $\alpha$                   | C-C motif chemokine 3 (CCL3)                              | RANTES                           | Parathyroid hormone (PTH)                           |
| IL-20                                      | Interleukin-20 (IL-20)                                      | MIP-1 $\beta$                    | C-C motif chemokine 4 (CCL4)                              | sCD30                            | C-C motif chemokine 5                               |
| IL-21                                      | Interleukin-21 (IL-21)                                      | MIP-1 $\delta$                   | C-C motif chemokine 15 (CCL15)                            | SCD-40L                          | Tumor necrosis factor receptor superfamily member 8 |
| IL-23                                      | Interleukin-23 (IL-23)                                      | MMP-1                            | Interstitial collagenase                                  | SCF                              | CD40 ligand (CD40-L)                                |
| IL-28a                                     | Interferon lambda-2                                         | MMP-2                            | 72 kDa type IV collagenase                                | SDF-1- $\alpha$ $\beta$          | c-kit ligand                                        |

|                       |                                                                      |                |                                                       |                    |                                                                      |
|-----------------------|----------------------------------------------------------------------|----------------|-------------------------------------------------------|--------------------|----------------------------------------------------------------------|
| IL-29/IFN- $\gamma$ 1 | Interferon lambda-1                                                  | MMP-3          | Stromelysin-1 (SL-1)                                  | sEGFR              | Stromal cell-derived factor 1 alpha and beta (SDF-1-alpha and beta)  |
| IL-33                 | Interleukin-33 (IL-33)                                               | MMP-7          | Matrilysin                                            | sFAS               | Epidermal growth factor receptor                                     |
| Insulin               | Insulin                                                              | MMP-8          | Neutrophil collagenase                                | sFASL              | Tumor necrosis factor receptor superfamily member 6 (FASLG receptor) |
| IP-10                 | C-X-C motif chemokine 10 (CXCL10)                                    | MMP-9          | Matrix metalloproteinase-9 (MMP-9)                    | sgp130             | Tumor necrosis factor ligand superfamily member 6 (FasL)             |
| Leptin                | Leptin                                                               | MMP-10         | Stromelysin-2                                         | sIL-1RI            | Interleukin-6 receptor subunit beta (IL-6R-beta)                     |
| LIF                   | Leukemia inhibitory factor (LIF)                                     | MMP-12         | Macrophage metalloelastase (MME)                      | sIL-1RII           | Interleukin-1 receptor type 1 (IL-1R-1)                              |
| MCP-1                 | C-C motif chemokine 2 (CCL2)                                         | MMP-13         | Collagenase 3                                         | sIL-2Ra            | Interleukin-1 receptor type 2 (IL-1R-2)                              |
| MCP-2                 | C-C motif chemokine 8 (CCL8)                                         | OC             | Osteocalcin                                           | sIL-4R             | Interleukin-2 receptor subunit alpha (IL-2R subunit alpha)           |
| MCP-3                 | C-C motif chemokine 7 (CCL7)                                         | OPG            | Tumor necrosis factor receptor superfamily member 11B | sIL-6R             | Interleukin-4 receptor subunit alpha (IL-4R subunit alpha)           |
| SOST                  | Interleukin-6 receptor (subunit alpha and beta) [IL-6R-(alpha+beta)] | TGF $\beta$ -1 | Transforming growth factor beta-1 (TGF-beta-1)        | TRAIL              | Tumor necrosis factor ligand superfamily member 10 (TNFSF10)         |
| sRAGE                 | Advanced glycosylation end product-specific receptor                 | TGF $\beta$ -2 | Transforming growth factor beta-2 (TGF-beta-2)        | TSLP               | Thymic stromal lymphopoietin                                         |
| sTNFR1                | Tumor necrosis factor receptor superfamily member 1A (TNF-R1)        | TGF $\beta$ -3 | Transforming growth factor beta-3 (TGF-beta-3)        | VEGF               | Vascular endothelial growth factor A (VEGF-A)                        |
| sTNFR2                | Tumor necrosis factor receptor superfamily member 1B (TNF-R2)        | TIMP-1         | Metalloproteinase inhibitor 1                         | VEGF-A             | Vascular endothelial growth factor A (VEGF-A)                        |
| sVEGFR1               | Vascular endothelial growth factor receptor 1 (VEGFR-1)              | TIMP-2         | Metalloproteinase inhibitor 2                         | VEGF-C             | Vascular endothelial growth factor C (VEGF-C)                        |
| sVEGFR2               | Vascular endothelial growth factor receptor 2 (VEGFR-2)              | TNF- $\alpha$  | Tumor necrosis factor                                 | VEGF-D             | Vascular endothelial growth factor D (VEGF-D)                        |
| sVEGFR3               | Vascular endothelial growth factor receptor 3 (VEGFR-3)              | TNF- $\beta$   | Lymphotoxin-alpha (LT-alpha)                          | Vitamin D BP       | Vitamin D-binding protein (DBP)                                      |
| TARC                  | C-C motif chemokine 17 (CC17)                                        | Total PSA      | Total Prostate-specific antigen (Total PSA)           | Vitronectin        | Vitronectin (VN)                                                     |
| TGF- $\alpha$         | Transforming growth factor alpha (TGF-alpha)                         | TPO            | Thyroid peroxidase (TPO)                              | XCL1/ Lymphotactin | Lymphotactin                                                         |

## Supplemental Figures

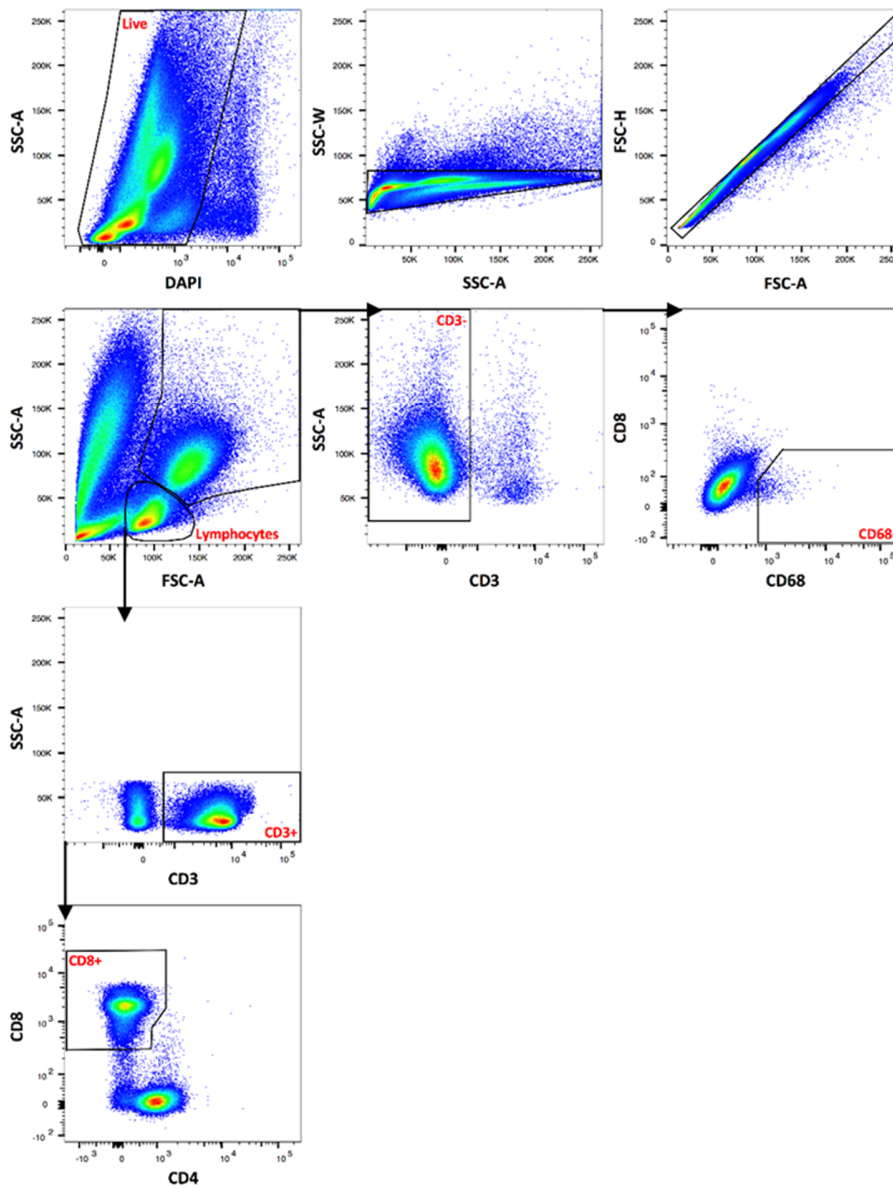

### Supplemental Figure 1. Peripheral blood flow sorting strategy

Peripheral blood mononuclear cells from patients with active HLH (pre-therapy) and severe sepsis were sorted for FACS in specific populations: CD3<sup>+</sup>8<sup>+</sup> cytotoxic T cells and CD68<sup>+</sup> monocytes. RNA was isolated from these cells and used for comparative gene expression studies (Figure 4).



| Analytes             | Training                                          |                |         | Validation                                        |                |            |        |          |
|----------------------|---------------------------------------------------|----------------|---------|---------------------------------------------------|----------------|------------|--------|----------|
|                      | Log Transformed Mean Concentration (pg/ml)<br>HLH | Fold<br>Change | p-value | Log Transformed Mean Concentration (pg/ml)<br>HLH | Fold<br>Change | p-value    |        |          |
| IL-8                 | 6.9 ± 1.4                                         | 1.7 ± 2.3      | 37.04   | 3.0E-07                                           | 6.7 ± 2.1      | 0.9 ± 1.2  | 55.56  | 6.34E-04 |
| CXCL5/MG             | 14.2 ± 2.2                                        | 8.6 ± 0.4      | 50.00   | 2.2E-06                                           | 13.3 ± 2.6     | 8.1 ± 1.1  | 37.04  | 6.86E-03 |
| CXCL11/11A-TAC       | 10.0 ± 2.1                                        | 4.1 ± 1.3      | 58.82   | 6.0E-07                                           | 9.8 ± 2.1      | 4.6 ± 1.0  | 35.71  | 9.62E-03 |
| MMP-8                | 11.3 ± 2.9                                        | 7.0 ± 0.0      | 18.87   | 1.5E-03                                           | 12.2 ± 3.6     | 7.9 ± 0.0  | 35.71  | 2.25E-03 |
| IL-10                | 7.6 ± 2.4                                         | 1.9 ± 0.4      | 50.00   | 5.7E-06                                           | 6.8 ± 2.5      | 1.9 ± 0.0  | 32.26  | 3.34E-02 |
| IL-8 (2)             | 5.8 ± 2.5                                         | 0.5 ± 0.0      | 40.00   | 2.9E-05                                           | 5.2 ± 3.0      | 0.5 ± 0.0  | 27.03  | 3.18E-02 |
| HSP70                | 19.0 ± 2.4                                        | 14.4 ± 0.8     | 25.54   | 1.1E-04                                           | 19.2 ± 2.1     | 14.7 ± 0.8 | 22.22  | 8.65E-05 |
| CXCL10/IP-10         | 12.7 ± 1.1                                        | 8.3 ± 0.5      | 21.29   | 1.0E-07                                           | 12.3 ± 1.5     | 7.9 ± 0.7  | 20.41  | 6.90E-05 |
| Granzyme-B           | 6.2 ± 3.3                                         | 1.5 ± 0.9      | 25.64   | 2.1E-03                                           | 5.9 ± 2.7      | 1.7 ± 1.6  | 18.18  | 2.16E-03 |
| IL-1RA               | 7.7 ± 2.4                                         | 4.4 ± 1.2      | 10.20   | 3.0E-03                                           | 7.6 ± 2.8      | 3.9 ± 1.8  | 12.99  | 9.57E-03 |
| BCA-1                | 8.1 ± 1.2                                         | 5.4 ± 1.0      | 6.67    | 1.8E-05                                           | 8.3 ± 1.5      | 4.7 ± 0.8  | 11.49  | 1.12E-05 |
| sIL-2Ra              | 13.4 ± 1.5                                        | 9.2 ± 1.9      | 18.52   | 4.7E-06                                           | 13.2 ± 2.5     | 10.0 ± 0.9 | 9.09   | 5.91E-03 |
| G-CSF                | 6.0 ± 1.5                                         | 4.4 ± 1.3      | 2.94    | 2.8E-02                                           | 6.6 ± 3.0      | 3.5 ± 1.5  | 8.33   | 1.47E-03 |
| TNF- $\alpha$ (2)    | 5.4 ± 1.6                                         | 2.3 ± 1.1      | 8.33    | 5.1E-04                                           | 5.4 ± 1.4      | 2.4 ± 1.3  | 7.69   | 1.82E-03 |
| TPO                  | 8.6 ± 1.7                                         | 6.2 ± 1.0      | 5.26    | 2.4E-03                                           | 8.9 ± 1.9      | 5.9 ± 0.7  | 7.69   | 5.45E-04 |
| M-CSF                | 9.5 ± 2.2                                         | 6.7 ± 0.0      | 7.14    | 4.9E-03                                           | 9.5 ± 3.0      | 6.7 ± 0.0  | 7.14   | 3.35E-02 |
| IL-7                 | 2.5 ± 1.7                                         | 0.4 ± 1.2      | 4.35    | 1.0E-02                                           | 2.6 ± 1.8      | -0.2 ± 1.0 | 6.67   | 1.90E-06 |
| CCL20/MIP-3 $\alpha$ | 6.0 ± 1.8                                         | 2.8 ± 0.4      | 9.09    | 2.5E-03                                           | 5.9 ± 2.0      | 3.3 ± 0.4  | 6.25   | 3.98E-02 |
| MIP-1 $\alpha$       | 4.3 ± 1.8                                         | 1.6 ± 0.0      | 6.67    | 1.0E-03                                           | 4.4 ± 1.8      | 1.8 ± 0.3  | 5.88   | 2.26E-03 |
| IL-6                 | 4.2 ± 2.1                                         | 1.5 ± 0.0      | 6.67    | 5.0E-03                                           | 4.0 ± 2.4      | 1.5 ± 0.0  | 5.88   | 1.88E-03 |
| sTNFR1               | 15.3 ± 1.1                                        | 11.4 ± 2.4     | 18.18   | 1.5E-06                                           | 14.7 ± 2.6     | 12.2 ± 0.5 | 5.56   | 3.08E-02 |
| HGF                  | 10.1 ± 2.2                                        | 6.8 ± 0.3      | 9.09    | 1.5E-03                                           | 9.8 ± 2.1      | 7.3 ± 0.3  | 5.56   | 4.28E-05 |
| TNF- $\alpha$ (3)    | 3.4 ± 1.8                                         | 0.4 ± 0.9      | 7.69    | 1.3E-03                                           | 3.1 ± 1.3      | 0.6 ± 1.0  | 5.56   | 2.48E-03 |
| TMF-1                | 17.9 ± 0.9                                        | 15.1 ± 0.7     | 7.14    | 4.0E-07                                           | 17.7 ± 1.2     | 15.2 ± 0.8 | 5.56   | 6.57E-05 |
| CXCL6/GCP-2          | 6.6 ± 1.5                                         | 3.9 ± 1.0      | 6.25    | 4.4E-04                                           | 6.4 ± 1.9      | 4.1 ± 0.7  | 5.00   | 6.45E-05 |
| IL-16                | 8.0 ± 1.1                                         | 5.7 ± 1.3      | 5.00    | 1.3E-04                                           | 8.2 ± 1.8      | 6.0 ± 2.0  | 4.55   | 7.91E-04 |
| IL-8 (3)             | 6.1 ± 2.1                                         | 3.0 ± 0.0      | 9.09    | 1.84E-03                                          | 5.1 ± 2.1      | 3.0 ± 0.0  | 4.35   | 2.20E-08 |
| IL-1 $\alpha$        | 5.7 ± 1.5                                         | 2.9 ± 0.0      | 6.67    | 1.84E-04                                          | 5.1 ± 1.3      | 2.9 ± 0.0  | 4.35   | 6.58E-03 |
| TNF- $\alpha$        | 4.9 ± 1.3                                         | 2.9 ± 0.1      | 4.00    | 1.1E-03                                           | 5.2 ± 1.7      | 3.0 ± 0.4  | 4.35   | 6.05E-03 |
| MIP-1B               | 5.8 ± 0.9                                         | 4.4 ± 0.4      | 2.70    | 1.2E-03                                           | 6.0 ± 1.0      | 3.9 ± 1.2  | 4.35   | 2.55E-04 |
| OPG                  | 9.9 ± 2.1                                         | 7.0 ± 0.7      | 7.14    | 2.7E-03                                           | 9.2 ± 1.8      | 7.2 ± 0.3  | 4.17   | 1.35E-02 |
| MIP-1 $\alpha$ (2)   | 4.8 ± 2.2                                         | 2.5 ± 0.0      | 5.00    | 2.2E-02                                           | 4.6 ± 2.1      | 2.5 ± 0.0  | 4.17   | 3.35E-02 |
| MCP-2                | 5.1 ± 1.5                                         | 3.4 ± 0.5      | 3.23    | 1.4E-02                                           | 5.3 ± 1.9      | 3.3 ± 0.6  | 4.17   | 1.69E-02 |
| sTNFR1               | 12.1 ± 1.1                                        | 8.9 ± 1.7      | 10.10   | 6.1E-06                                           | 11.5 ± 1.6     | 8.9 ± 0.4  | 4.00   | 1.37E-02 |
| CCL19/MIP-3B         | 8.5 ± 1.5                                         | 6.9 ± 0.7      | 3.70    | 7.8E-03                                           | 8.1 ± 1.6      | 6.1 ± 0.6  | 3.85   | 8.51E-03 |
| MIP-1 $\delta$       | 12.1 ± 1.0                                        | 9.9 ± 1.5      | 4.55    | 2.84E-04                                          | 12.1 ± 1.0     | 10.2 ± 0.9 | 3.70   | 2.41E-04 |
| CTACK                | 9.4 ± 1.0                                         | 8.1 ± 0.9      | 2.44    | 1.0E-02                                           | 9.7 ± 1.1      | 8.0 ± 0.4  | 3.23   | 1.40E-03 |
| IL-15                | 3.2 ± 1.4                                         | 1.3 ± 0.0      | 3.85    | 2.5E-03                                           | 3.0 ± 1.8      | 1.3 ± 0.0  | 3.13   | 1.95E-02 |
| MMP-1                | 10.0 ± 1.6                                        | 8.3 ± 0.5      | 3.23    | 2.0E-02                                           | 10.3 ± 1.4     | 8.6 ± 0.7  | 3.03   | 1.46E-02 |
| Angiopoietin-2       | 12.7 ± 1.5                                        | 10.7 ± 0.7     | 4.17    | 3.6E-03                                           | 12.4 ± 1.6     | 10.9 ± 0.6 | 2.70   | 4.66E-02 |
| XCL1/Lymphotactin    | 6.6 ± 1.0                                         | 5.7 ± 1.2      | 2.17    | 2.7E-02                                           | 6.4 ± 1.1      | 5.1 ± 1.4  | 2.44   | 3.04E-02 |
| sFAS                 | 11.8 ± 0.9                                        | 10.0 ± 0.4     | 3.33    | 1.1E-04                                           | 11.6 ± 1.0     | 10.4 ± 0.4 | 2.27   | 1.18E-02 |
| IL-29/FN $\gamma$ 1  | 7.7 ± 1.0                                         | 6.5 ± 0.0      | 2.22    | 8.6E-03                                           | 7.7 ± 0.9      | 6.6 ± 0.2  | 2.08   | 1.61E-02 |
| VEGF-A               | 6.4 ± 1.7                                         | 8.2 ± 0.8      | 3.52    | 1.7E-02                                           | 7.3 ± 1.2      | 8.7 ± 0.9  | -2.62  | 1.74E-02 |
| ECM1                 | 20.1 ± 0.9                                        | 22.1 ± 2.3     | -4.05   | 3.31E-03                                          | 20.0 ± 1.0     | 21.4 ± 0.9 | -2.62  | 8.85E-05 |
| FGF-2 (3)            | 6.9 ± 0.7                                         | 7.7 ± 0.6      | -1.79   | 2.47E-02                                          | 6.4 ± 0.5      | 8.2 ± 0.7  | -3.47  | 2.34E-02 |
| FGF-1                | 4.4 ± 0.7                                         | 5.5 ± 0.6      | -2.15   | 2.6E-03                                           | 4.4 ± 0.5      | 6.2 ± 0.5  | -3.57  | 1.08E-04 |
| HB-EGF               | 4.0 ± 1.0                                         | 5.5 ± 0.8      | -2.74   | 4.04E-03                                          | 4.2 ± 1.3      | 6.1 ± 0.5  | -3.81  | 1.05E-02 |
| PLGF                 | 3.3 ± 1.5                                         | 4.9 ± 0.6      | -3.03   | 2.1E-02                                           | 3.1 ± 1.2      | 5.1 ± 1.1  | -4.05  | 1.42E-03 |
| Endothelin-1         | 3.8 ± 1.3                                         | 5.7 ± 0.6      | -3.63   | 2.0E-03                                           | 3.8 ± 1.1      | 6.1 ± 0.8  | -4.89  | 1.00E-07 |
| BMP-9                | 5.0 ± 2.2                                         | 7.2 ± 0.7      | -4.61   | 2.5E-02                                           | 5.3 ± 2.4      | 8.0 ± 0.8  | -4.40  | 3.9E-02  |
| VEGF-D               | 5.6 ± 1.9                                         | 7.6 ± 0.7      | -3.93   | 2.2E-02                                           | 5.2 ± 1.7      | 8.0 ± 1.2  | -6.66  | 1.18E-03 |
| VEGF-C               | 6.2 ± 2.0                                         | 8.5 ± 0.4      | -4.74   | 1.27E-02                                          | 5.5 ± 1.8      | 9.0 ± 0.6  | -10.72 | 4.82E-05 |
| MMP-13               | 8.2 ± 1.7                                         | 10.2 ± 0.6     | -4.08   | 7.5E-03                                           | 6.4 ± 3.3      | 10.6 ± 0.9 | -18.22 | 5.79E-03 |

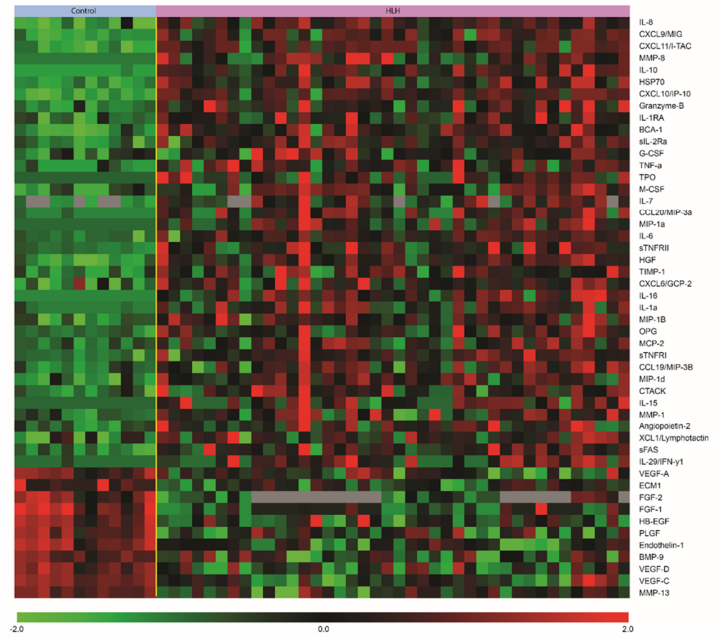

## Supplemental Figure 2A. Plasma inflammatory proteins: HLH versus control

(left) Heatmap demonstrates relative concentration of analytes with significant differential expression using supervised comparison of HLH and non-inflammatory controls.

(right) Values for analytes with differential expression between HLH and non-inflammatory control datasets are displayed for discovery and validation cohorts.

| Analytes         | Training                                                  |          |             |          | Validation                                                |          |             |          |
|------------------|-----------------------------------------------------------|----------|-------------|----------|-----------------------------------------------------------|----------|-------------|----------|
|                  | Log Transformed Mean Concentration (pg/ml) Sepsis or SIRS | CTL      | Fold Change | p-value  | Log Transformed Mean Concentration (pg/ml) Sepsis or SIRS | CTL      | Fold Change | p-value  |
| IL-6 (2)         | 5.9±3.2                                                   | -16±0.0  | 17.41       | 1.41E-05 | 3.9±0.5                                                   | -1.9±0.0 | 227.27      | 1.02E-04 |
| MMP-8            | 14.5±3.2                                                  | 7.0±0.0  | 17.24       | 7.30E-06 | 3.5±0.5                                                   | 7.0±0.0  | 166.67      | 8.00E-06 |
| IL-8             | 8.1±3.1                                                   | 1.7±2.3  | 63.33       | 6.94E-05 | 6.9±0.4                                                   | 0.9±1.2  | 83.33       | 3.00E-07 |
| IL-8 (2)         | 6.8±4.1                                                   | 0.5±0.0  | 79.92       | 9.59E-04 | 7.3±2.3                                                   | 0.5±0.0  | 56.92       | 1.46E-04 |
| IL-6             | 7.2±3.5                                                   | 1.5±0.0  | 52.63       | 4.90E-04 | 17.9±1.1                                                  | 1.5±0.0  | 38.46       | 1.81E-03 |
| IL-1RA           | 9.3±2.4                                                   | 4.4±1.2  | 29.41       | 6.50E-05 | 14.4±3.3                                                  | 3.9±1.8  | 27.78       | 9.57E-05 |
| CCSF             | 8.2±3.4                                                   | 4.4±1.3  | 13.99       | 1.37E-02 | 11.9±1.1                                                  | 3.9±1.5  | 23.26       | 1.49E-02 |
| HSP70            | 18.4±2.1                                                  | 14.4±0.8 | 16.39       | 1.24E-04 | 9.1±1.4                                                   | 14.7±0.6 | 14.08       | 1.48E-04 |
| IL-10            | 6.0±2.5                                                   | 1.9±0.4  | 16.35       | 6.41E-04 | 11.0±1.0                                                  | 1.8±0.0  | 13.70       | 4.39E-03 |
| IL-8 (3)         | 7.2±2.9                                                   | 3.0±0.0  | 19.61       | 1.90E-03 | 6.1±0.8                                                   | 3.0±0.0  | 13.51       | 1.62E-03 |
| MIP              | 12.6±3.2                                                  | 7.3±0.0  | 40.00       | 3.80E-04 | 4.1±1.5                                                   | 7.0±0.0  | 12.99       | 7.90E-04 |
| EGF              | 8.0±2.5                                                   | 4.3±1.5  | 13.33       | 1.94E-03 | 6.1±1.5                                                   | 4.6±1.4  | 12.36       | 2.15E-03 |
| TNF              | 9.3±1.2                                                   | 6.2±1.0  | 8.33        | 2.70E-05 | 8.7±2.4                                                   | 5.9±0.7  | 9.09        | 9.60E-06 |
| CXCL16/GCP-2     | 7.1±1.7                                                   | 3.9±1.0  | 9.09        | 1.81E-04 | 10.3±1.6                                                  | 4.1±0.7  | 9.09        | 2.98E-04 |
| CXCL16/MIP-10    | 11.4±1.9                                                  | 6.6±0.4  | 7.14        | 9.83E-04 | 6.3±4.1                                                   | 8.1±1.1  | 9.09        | 1.94E-02 |
| TGF- $\beta$ (2) | 4.2±1.5                                                   | 1.1±0.1  | 8.33        | 7.46E-05 | 6.4±3.3                                                   | 1.0±0.0  | 8.33        | 4.21E-05 |
| HGF              | 11.1±1.7                                                  | 6.8±0.3  | 16.87       | 2.70E-06 | 18.5±2.1                                                  | 7.3±0.3  | 8.33        | 1.38E-04 |
| OPG              | 10.2±1.8                                                  | 7.0±0.7  | 9.09        | 3.90E-04 | 2.9±1.2                                                   | 7.2±0.3  | 7.14        | 9.00E-04 |
| TMP-1            | 18.0±1.1                                                  | 15.1±0.7 | 7.69        | 1.80E-05 | 14.2±1.1                                                  | 15.2±0.8 | 6.67        | 3.70E-06 |
| MMP-10           | 10.4±1.6                                                  | 6.3±0.7  | 4.35        | 4.12E-03 | 10.7±1.0                                                  | 8.0±0.2  | 6.67        | 2.77E-04 |
| MCSF             | 9.3±2.2                                                   | 6.7±0.0  | 6.25        | 7.81E-03 | 10.7±1.6                                                  | 6.7±0.0  | 6.67        | 6.95E-03 |
| IL-8 (4)         | 7.0±3.0                                                   | 3.4±0.8  | 12.20       | 8.38E-03 | 7.3±1.8                                                   | 4.0±0.8  | 6.67        | 1.88E-02 |
| MCP-1            | 10.3±1.5                                                  | 7.4±1.1  | 7.69        | 1.87E-04 | 3.7±1.3                                                   | 7.9±0.7  | 6.25        | 1.85E-03 |
| IL-16            | 9.0±2.0                                                   | 5.7±1.3  | 10.00       | 8.39E-04 | 8.3±1.2                                                   | 6.0±2.0  | 6.25        | 4.86E-03 |
| IL-6 (3)         | 5.3±2.3                                                   | 3.1±0.0  | 4.76        | 2.80E-02 | 8.4±1.1                                                   | 3.1±0.0  | 6.25        | 5.45E-02 |
| CXCL11/TAC       | 7.4±2.2                                                   | 4.1±1.3  | 10.31       | 1.14E-03 | 4.7±1.2                                                   | 4.6±1.0  | 5.88        | 1.40E-02 |
| TNFR1            | 11.9±1.2                                                  | 8.9±1.7  | 8.33        | 2.94E-03 | 3.8±1.1                                                   | 9.5±0.4  | 6.67        | 1.46E-04 |
| MMP-1            | 10.7±1.7                                                  | 8.3±0.5  | 5.56        | 1.25E-03 | 4.7±1.3                                                   | 8.6±0.7  | 5.28        | 1.25E-06 |
| MMP-3            | 14.2±1.5                                                  | 12.1±0.7 | 4.17        | 3.21E-03 | 11.2±2.4                                                  | 11.9±0.4 | 5.28        | 9.76E-04 |
| IL-7             | 2.9±1.4                                                   | 0.4±1.2  | 5.56        | 6.84E-04 | 10.0±1.8                                                  | -0.2±1.0 | 5.28        | 1.75E-03 |
| IP-10            | 10.2±1.7                                                  | 8.3±0.5  | 3.70        | 1.34E-02 | 14.3±1.6                                                  | 7.9±0.7  | 5.00        | 2.49E-02 |
| TNFR (2)         | 9.0±1.2                                                   | 2.3±1.1  | 6.25        | 6.46E-05 | 5.6±1.0                                                   | 2.4±1.3  | 4.76        | 5.05E-04 |
| MIP-1B           | 6.2±0.8                                                   | 4.4±0.4  | 3.33        | 3.84E-05 | 13.0±1.4                                                  | 3.9±1.2  | 4.55        | 1.46E-05 |
| VEGF             | 8.3±1.1                                                   | 6.8±1.9  | 2.94        | 1.35E-02 | 6.7±2.5                                                   | 6.2±1.6  | 4.55        | 5.01E-04 |
| SCF              | 5.0±2.0                                                   | 2.5±1.2  | 5.56        | 7.98E-03 | 2.9±1.1                                                   | 2.5±1.2  | 4.55        | 6.14E-04 |
| GRO              | 10.3±1.7                                                  | 7.1±2.6  | 9.09        | 1.28E-03 | 2.2±1.6                                                   | 7.9±0.6  | 4.55        | 2.20E-02 |
| CXCL16/MIP-3B    | 7.9±1.4                                                   | 6.6±0.7  | 2.56        | 2.87E-02 | 19.4±1.4                                                  | 6.1±0.6  | 4.35        | 4.08E-04 |
| MCP-2            | 5.0±1.4                                                   | 3.4±0.5  | 3.13        | 1.05E-02 | 6.3±1.7                                                   | 3.5±0.6  | 4.35        | 3.40E-03 |
| SCD-40L          | 11.1±2.1                                                  | 8.0±1.5  | 8.33        | 2.16E-03 | 10.6±1.8                                                  | 9.1±1.5  | 4.35        | 4.12E-02 |
| Angiopoietin-2   | 12.6±1.5                                                  | 10.7±0.7 | 3.85        | 3.78E-03 | 8.2±2.5                                                   | 10.9±0.6 | 4.17        | 1.55E-03 |
| IL-1Ra           | 12.2±1.4                                                  | 9.2±1.9  | 7.69        | 1.97E-04 | 12.0±1.4                                                  | 10.0±0.9 | 4.17        | 2.28E-03 |
| IL-6 (1)         | 7.1±1.2                                                   | 5.4±1.0  | 3.23        | 4.03E-03 | 6.9±1.0                                                   | 4.7±0.8  | 4.17        | 2.71E-03 |
| sTNFR1           | 14.0±1.1                                                  | 11.4±2.4 | 9.09        | 5.98E-05 | 5.4±1.6                                                   | 12.2±0.5 | 4.00        | 2.17E-04 |
| MIP-1a           | 3.7±1.7                                                   | 1.6±0.0  | 4.35        | 5.98E-03 | 5.5±2.9                                                   | 1.8±0.3  | 4.00        | 8.11E-03 |
| DKK1             | 10.7±0.8                                                  | 8.0±0.4  | 6.25        | 1.00E-07 | 8.6±1.9                                                   | 8.8±0.2  | 3.70        | 2.48E-04 |
| TNFR (3)         | 2.7±1.2                                                   | 0.4±0.9  | 5.00        | 2.37E-04 | 2.4±1.3                                                   | 0.6±1.0  | 3.45        | 5.28E-03 |
| MCP-3            | 6.1±0.0                                                   | 3.5±1.1  | 9.86        | 7.06E-03 | 9.4±2.2                                                   | 3.9±1.1  | 3.33        | 3.18E-02 |
| MIP-1B (2)       | 5.4±1.2                                                   | 4.0±0.5  | 2.70        | 7.35E-03 | 13.7±1.0                                                  | 4.0±0.9  | 3.13        | 1.54E-03 |
| IL-15            | 2.9±1.6                                                   | 1.3±0.0  | 3.03        | 1.83E-02 | 11.5±1.0                                                  | 1.9±0.0  | 3.13        | 1.73E-03 |
| EOTAXIN-2        | 6.9±1.6                                                   | 6.9±1.1  | 4.17        | 6.95E-03 | 3.9±1.7                                                   | 7.9±1.0  | 2.86        | 4.18E-02 |
| MIP-1d           | 11.9±1.4                                                  | 8.9±1.5  | 3.57        | 7.60E-03 | 8.1±4.1                                                   | 10.2±0.9 | 2.44        | 7.03E-03 |
| MMP-7            | 13.7±1.3                                                  | 10.5±0.0 | 2.33        | 2.99E-02 | 7.2±2.3                                                   | 12.5±0.0 | 2.38        | 6.61E-03 |
| IL-309           | 2.9±1.1                                                   | 1.7±0.5  | 2.22        | 2.07E-02 | 11.3±2.9                                                  | 1.9±0.5  | 1.75        | 2.06E-02 |
| FGF-2 (2)        | 6.8±0.8                                                   | 7.7±0.6  | 0.53        | 3.53E-03 | 6.7±2.6                                                   | 8.2±0.7  | 0.33        | 1.00E-07 |
| TRAIL            | 3.6±1.0                                                   | 5.9±0.5  | 0.21        | 1.34E-05 | 10.3±2.4                                                  | 5.7±0.7  | 0.28        | 5.13E-04 |
| ECM1             | 18.0±1.5                                                  | 22.1±2.3 | 0.11        | 4.24E-04 | 2.6±0.8                                                   | 21.4±0.9 | 0.25        | 1.78E-03 |
| TRAF-2 (2)       | 3.5±1.2                                                   | 5.8±0.7  | 0.21        | 2.62E-04 | 10.1±2.2                                                  | 6.0±0.4  | 0.21        | 3.98E-04 |
| PLGF             | 3.2±1.2                                                   | 4.9±0.6  | 0.30        | 2.22E-03 | 10.2±2.3                                                  | 5.1±1.1  | 0.21        | 1.75E-04 |
| FGF-1            | 4.0±0.4                                                   | 5.5±0.6  | 0.36        | 2.00E-07 | 5.2±1.8                                                   | 6.2±0.5  | 0.20        | 1.00E-07 |
| Endostatin-1     | 4.0±0.8                                                   | 5.7±0.6  | 0.32        | 4.83E-05 | 11.2±2.3                                                  | 6.1±0.8  | 0.16        | 1.00E-07 |
| Leptin (3)       | 10.4±2.1                                                  | 12.9±1.6 | 0.22        | 2.86E-02 | 9.4±1.6                                                   | 13.0±1.7 | 0.15        | 1.97E-02 |
| VEGF-C           | 6.4±1.5                                                   | 8.5±0.4  | 0.23        | 2.14E-03 | 5.7±3.1                                                   | 9.0±0.6  | 0.13        | 8.26E-05 |

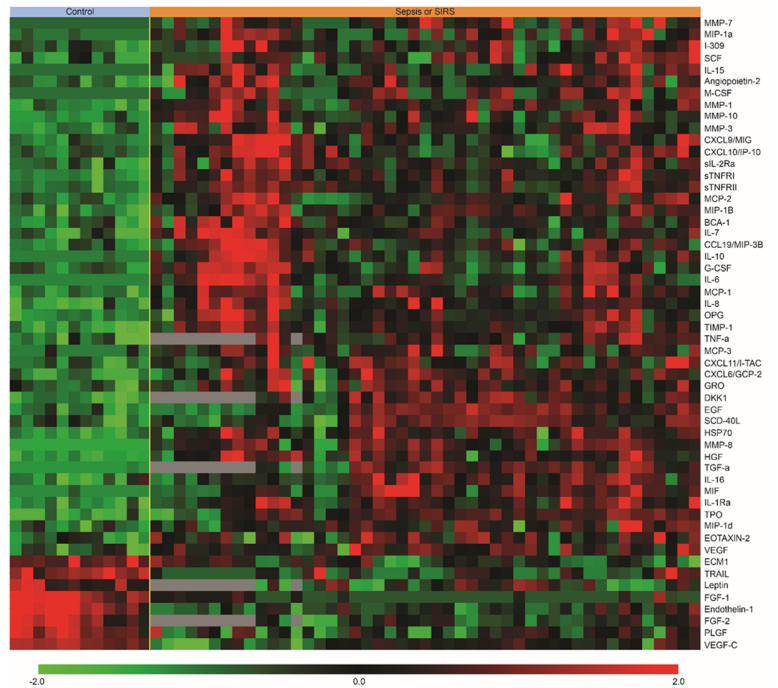

### Supplemental Figure 2B. Plasma inflammatory proteins: Sepsis/SIRS versus control

(left) Heatmap demonstrates relative concentration of analytes with significant differential expression using supervised comparison of SIRS/sepsis and non-inflammatory controls.

(right) Values for analytes with differential expression between HLH and non-inflammatory control datasets are displayed for discovery and validation cohorts.

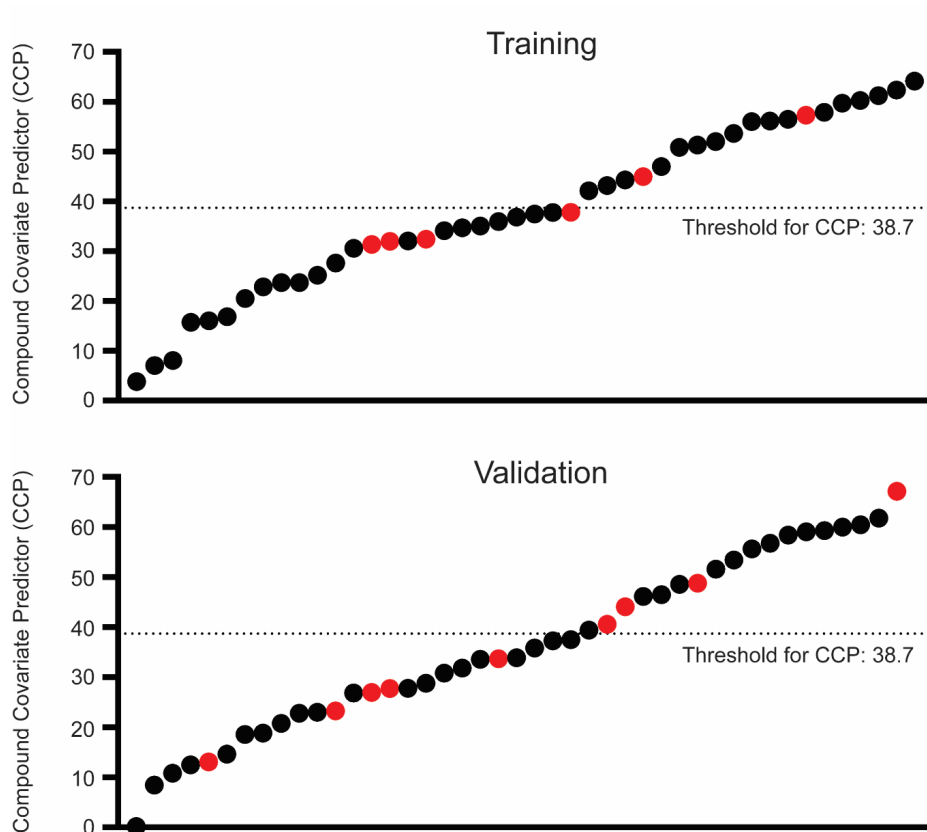

**Supplemental Figure 3. Compound Covariate Predictor Performance.** Scatterplots of the compound covariate predictor scores for each sample in the classifier of the training and validation sets are presented. The prediction score is defined by the inner sum of the weights ( $w_i$ ) and log intensity ( $x_i$ ) of each significant protein. The weight for each protein is determined using the t statistic of differential expression in the training set and the threshold is the midpoint means of the two classes ( $C_t = (C_1+C_2)/2$ ). A sample is classified as HLH if the sum is greater than the threshold ( $\sum w_i x_i > \text{threshold}$ ). Incorrectly classified samples are shown in red.

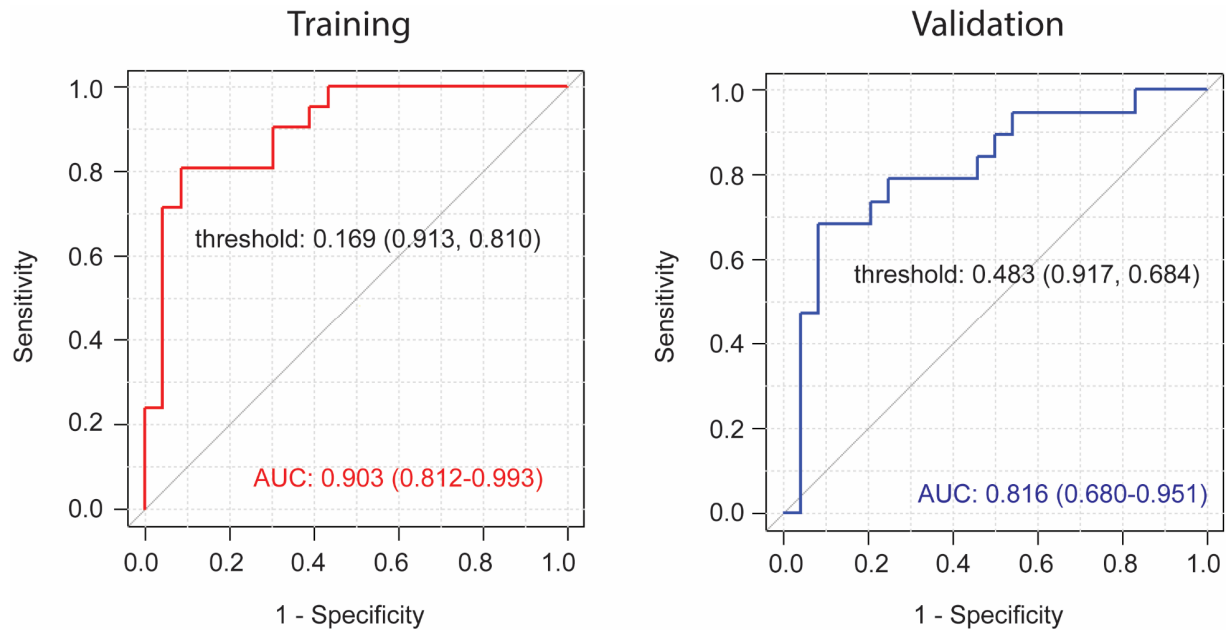

**Supplemental Figure 4. Performance of CXCL9/IL6 Ratio as a Classifier.** Receiver operating curves of the CXCL9/IL6 ratio in training and validation sets for diagnostic accuracy of HLH or sepsis/SIRS. Receiver operating curves of the CXCL9/IL6 ratio in discovery and validation sets for diagnostic accuracy of HLH or sepsis/SIRS. The ratio thresholds were chosen to derive the best specificity and sensitivity based on the Youden index (the numbers in parentheses following “threshold”). AUC denotes the area under then ROC and the numbers in parenthesis are 95% CI.

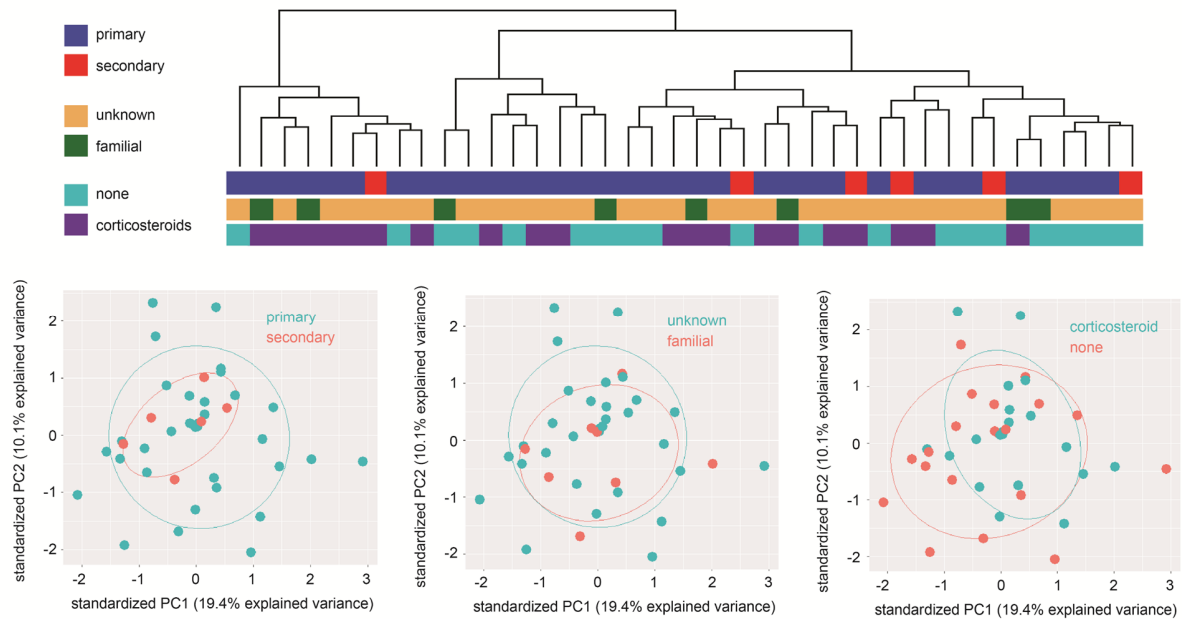

### Supplemental Figure 5. Unsupervised Clustering of HLH Plasma Samples

Unsupervised clustering (A) and principal component analysis (PCA) (B) demonstrate lack of grouping of HLH specimens based on classes: primary (not autoimmune or cancer) vs secondary (associated with autoimmune disease or cancer); familial (proven HLH-associated genetic variants) vs unproven/unknown genetic associations; or no pretreatment with corticosteroids vs corticosteroid pretreatment prior to plasma collection. No statistical differences were noted between these groups, though it is possible differences could be identified with a larger dataset.

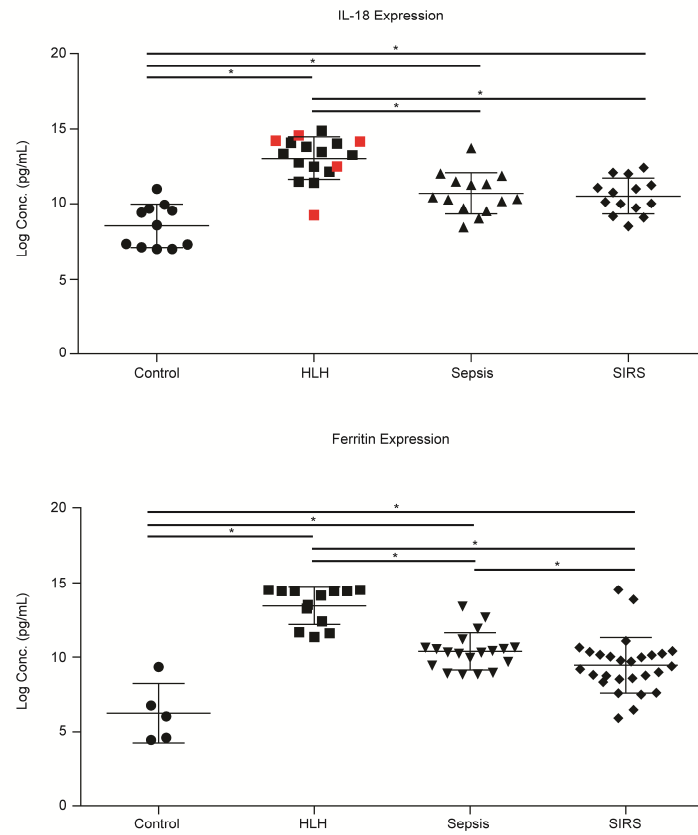

**Supplemental Figure 6. IL-18 and ferritin: HLH versus sepsis and SIRS.** Plots demonstrate IL-18 (top) and ferritin (bottom) concentrations for control, HLH, sepsis and SIRS groups. Bars with (\*) indicate groups with statistically significant differential expression. Red indicates cases of secondary HLH.

**Supplemental Files. Subject Details**

*Supplemental File 1A. HLH Subjects*

*Supplemental File 1B. SIRS/Sepsis Subjects*

Attached as an excel file with separate tabs for Files 1A and 1B.
